# Supplementary material
Source: PubMed Central journal article supplement (PMC6281331)

**Supplementary Information for:**

**Genome-wide analysis of SNPs is consistent with no domestic dog ancestry in the endangered Mexican wolf (*Canis lupus baileyi*)**

Fitak RR, Rinkevich SE, and Culver M

**Table of Contents:**

|                                   |              |
|-----------------------------------|--------------|
| <b>Supplementary Table S2</b>     | Page 2       |
| <b>Supplementary Figures S1-3</b> | Pages 3 - 10 |

**Note:** Supplementary Table S1 [Description and summary of the Mexican wolves used in this study, including all results generated on a per-individual basis] has been uploaded as a separate file in the supplemental material.

**Table S2.** Reproducibility of genotypes across eight replicated Mexican wolves (*Canis lupus baileyi*) on the CanineHD BeadChip.

| <b>ID</b>   | <b># Correct</b> | <b># Errors</b> | <b>Total</b> | <b>Frequency</b> |
|-------------|------------------|-----------------|--------------|------------------|
| 10          | 171001           | 3               | 171004       | 0.99998          |
| 29          | 171015           | 7               | 171022       | 0.99996          |
| 72          | 171146           | 12              | 171158       | 0.99993          |
| 412         | 170856           | 7               | 170863       | 0.99996          |
| 547         | 170350           | 3               | 170353       | 0.99998          |
| 1038        | 170666           | 17              | 170683       | 0.99990          |
| 66          | 141798           | 9936            | 151734       | 0.93452          |
| 593         | 160141           | 178             | 160319       | 0.99889          |
| <b>Mean</b> | 165871.6         | 1270.4          | 167142.0     | 0.99164          |
| <b>SD</b>   | 10425.6          | 3501.9          | 7238.3       | 0.02308          |

**Figure S1.** Model of demographic history used in the simulations. The four extant populations include North American, or Yellowstone, gray wolves (NAGW), Mexican wolves (MW), domestic dogs (DOG), and European gray wolves (EUGW). Effective population sizes are shown inside each population and divergence times (dotted lines) are provided in years. The three migration bands (red arrows) simulated occurred ‘g’ generations in the past. See Table 2 (main text) for a complete description of all migration schemes.

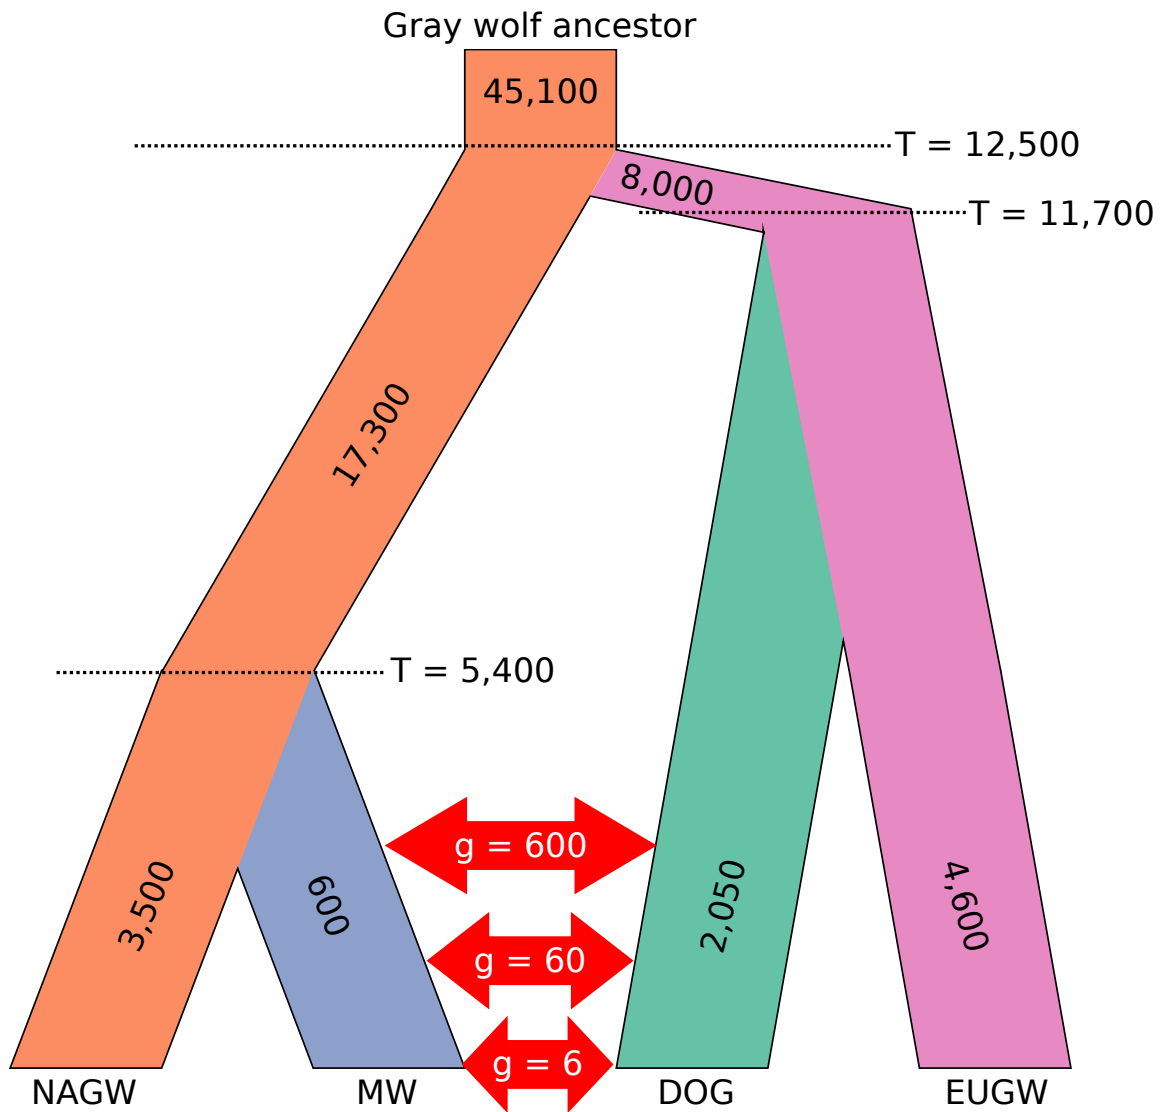

**Figure S2.** Proportion of North American gray wolf (yellow), European gray wolf (orange), and domestic dog (blue) ancestry in 88 Mexican wolves summed across all chromosomes from the local ancestry fragments inferred using LAMP-LD. Mexican wolves are separated by their captive population of origin, MB = McBride, AR = Aragón, GR = Ghost Ranch, or CL = cross-lineage.

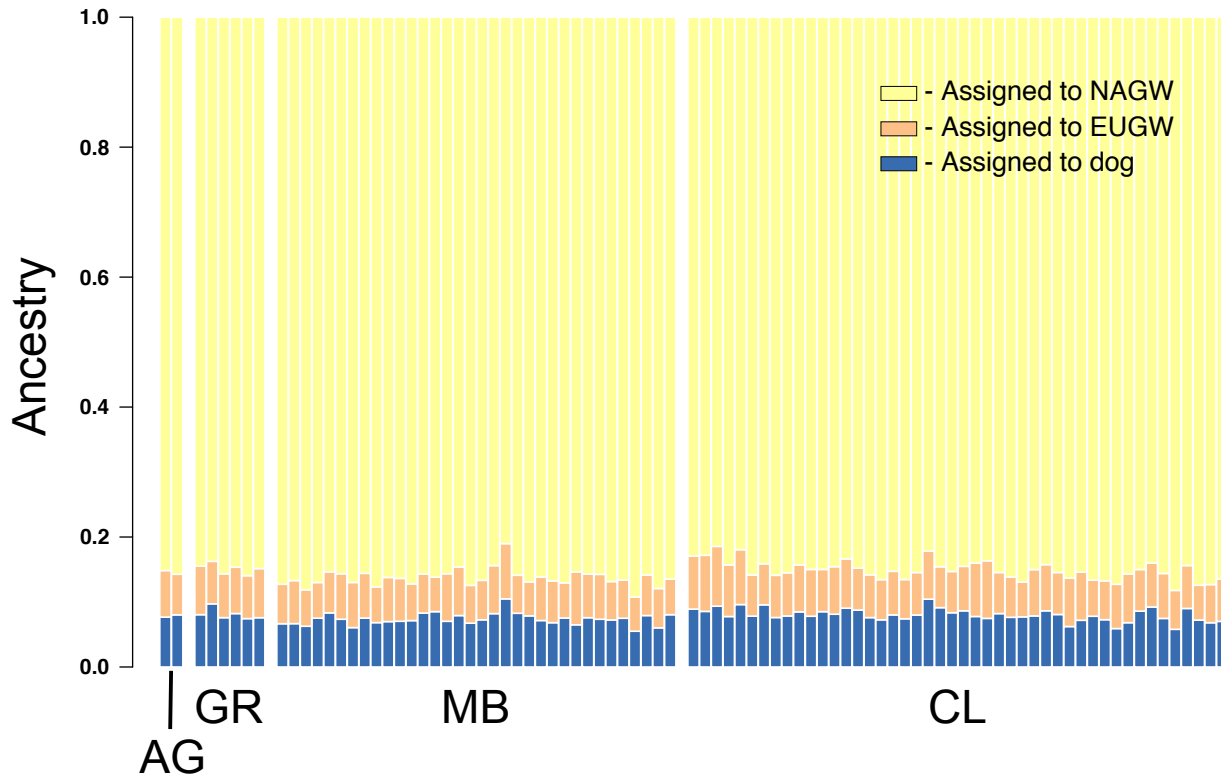

**Figure S3.** Locations of local ancestry fragments assigned to North American gray wolf (yellow), European gray wolf (orange), or domestic dog (blue) parental populations. Each plot shows an individual Mexican wolf's genome, whose studbook number and population are given.

Fitak\_SupMat\_FigS3 Genomic ancestry of Mexican wolves JHered

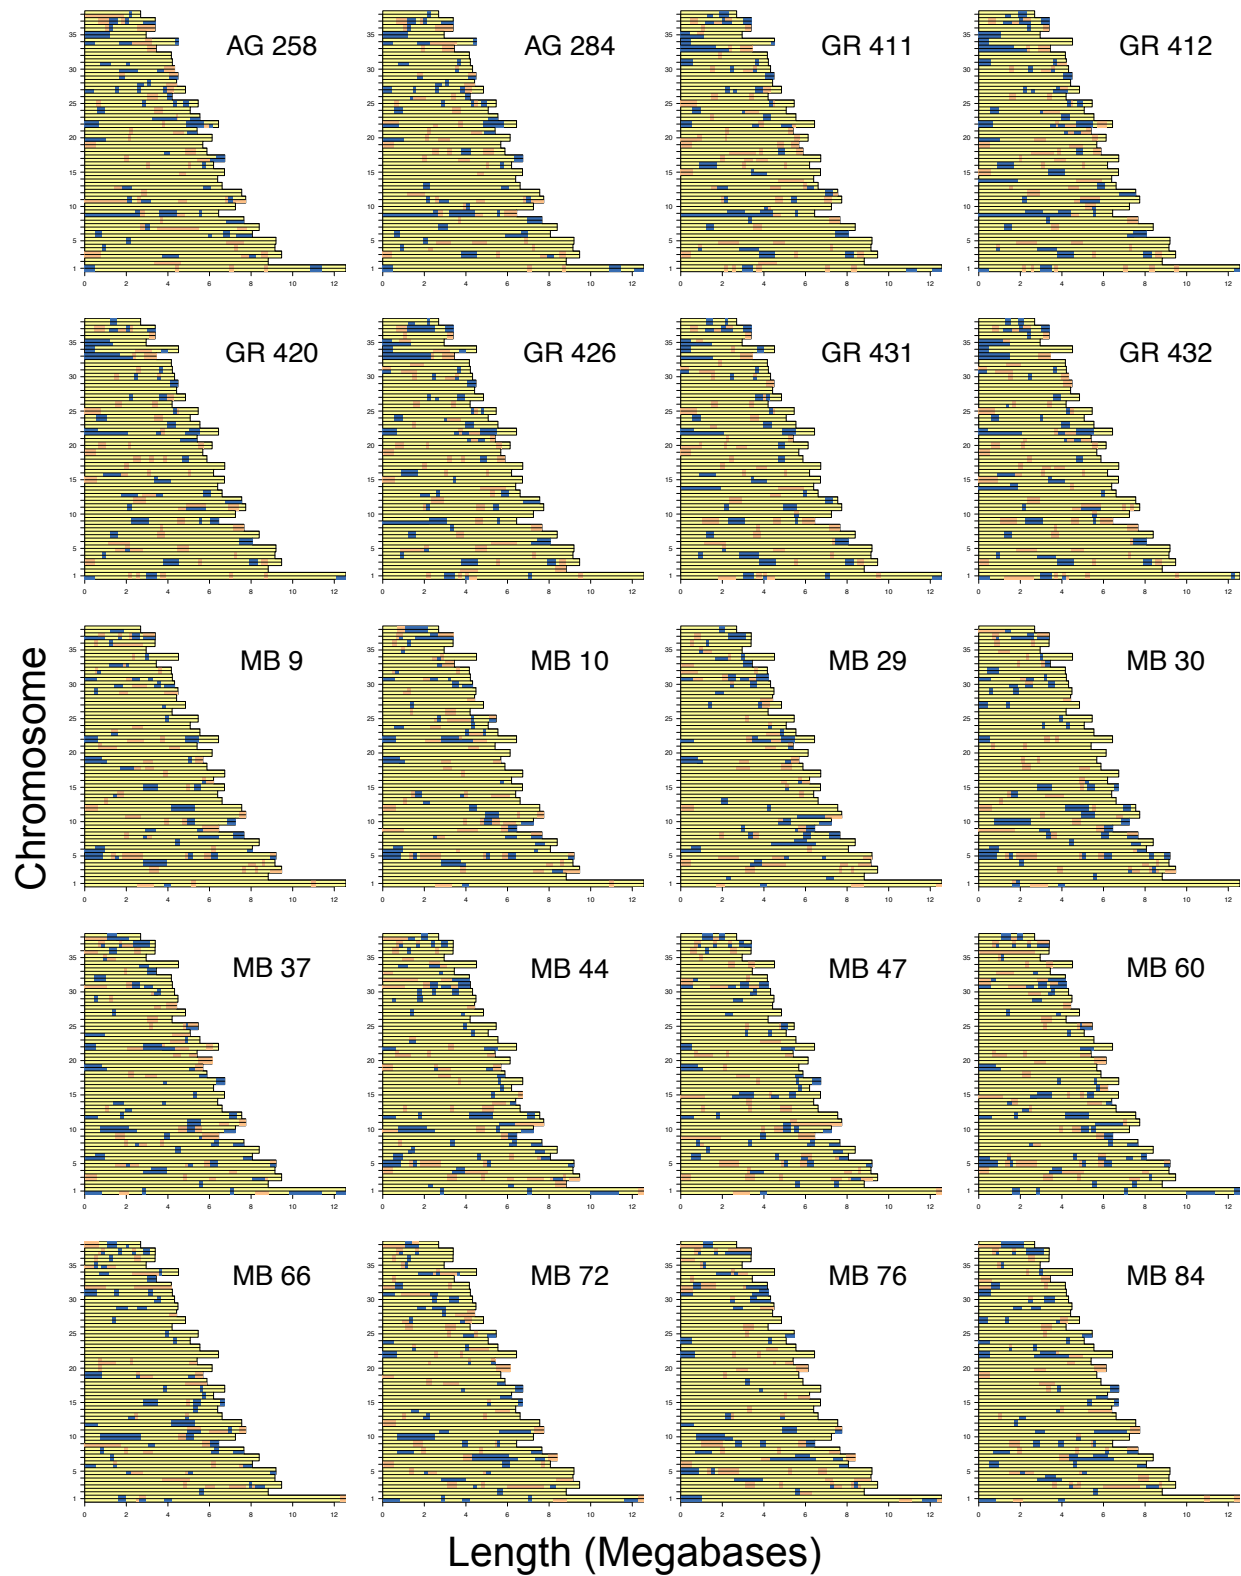

Fitak\_SupMat\_FigS3 Genomic ancestry of Mexican wolves JHered

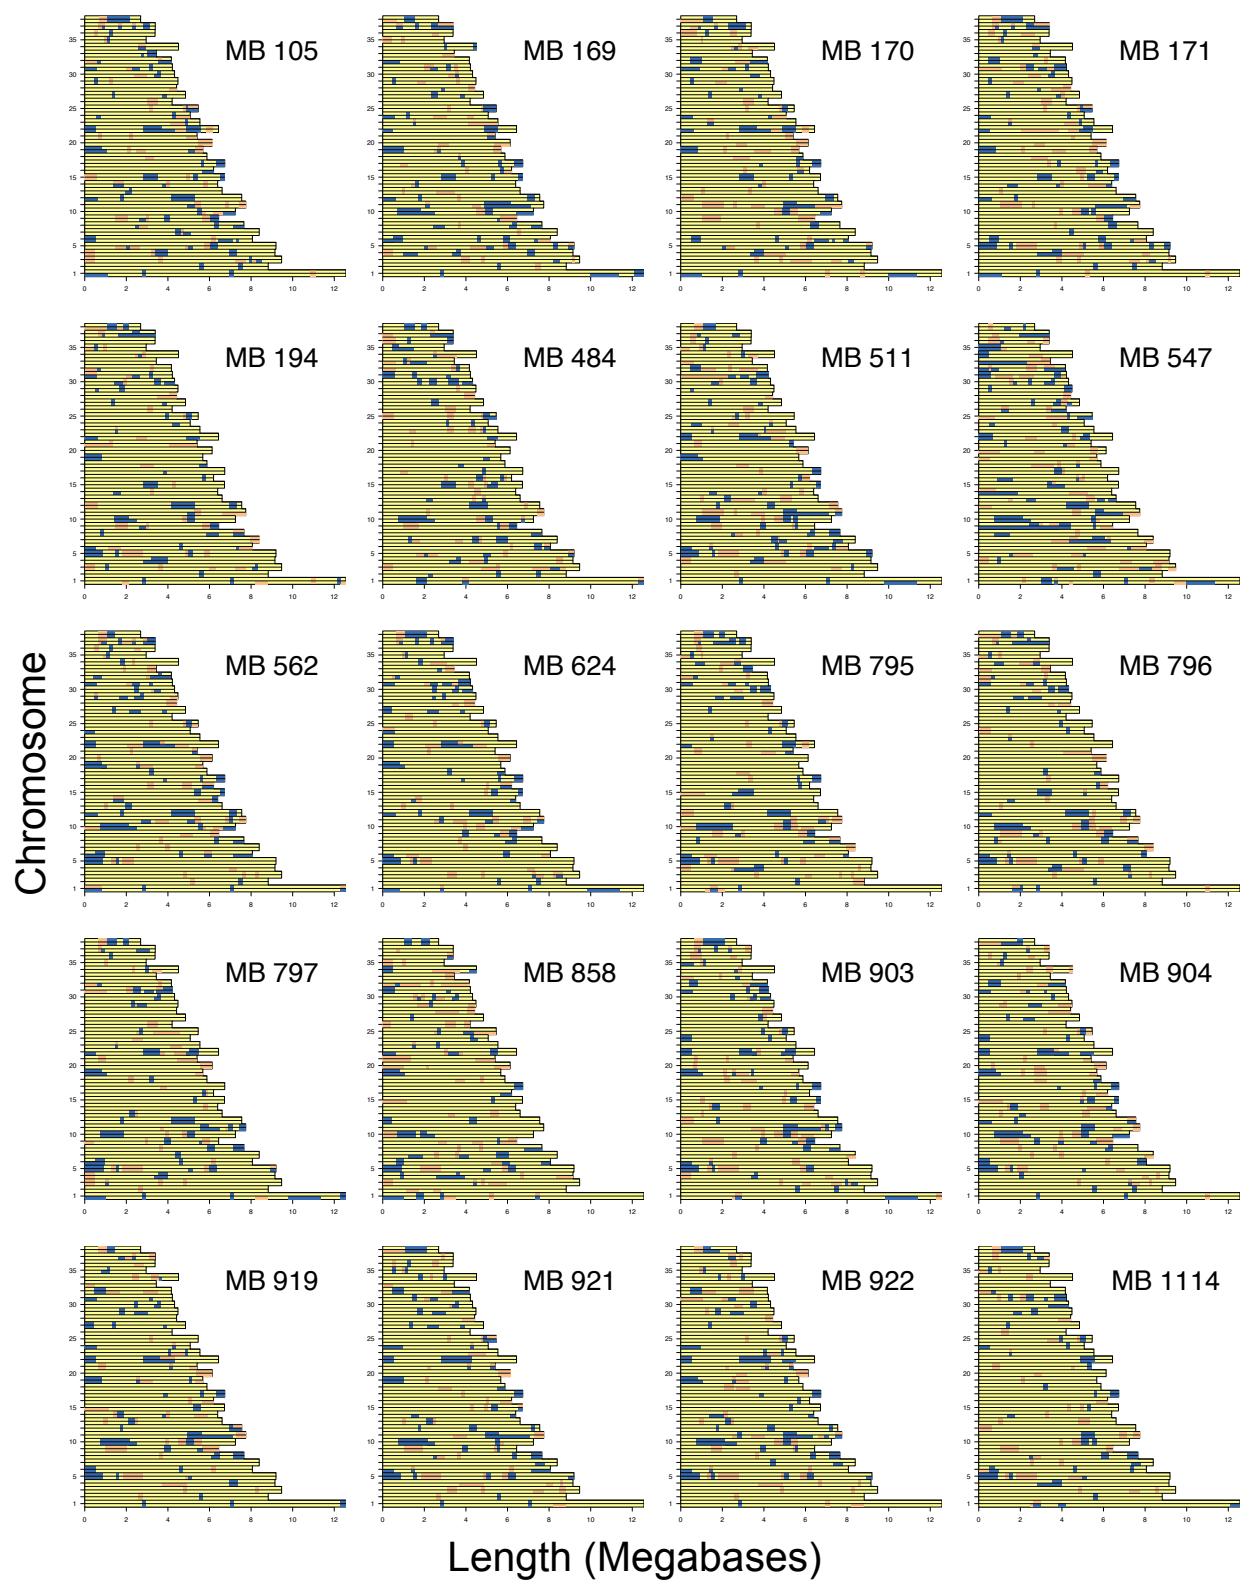

# Fitak\_SupMat\_FigS3 Genomic ancestry of Mexican wolves JHered

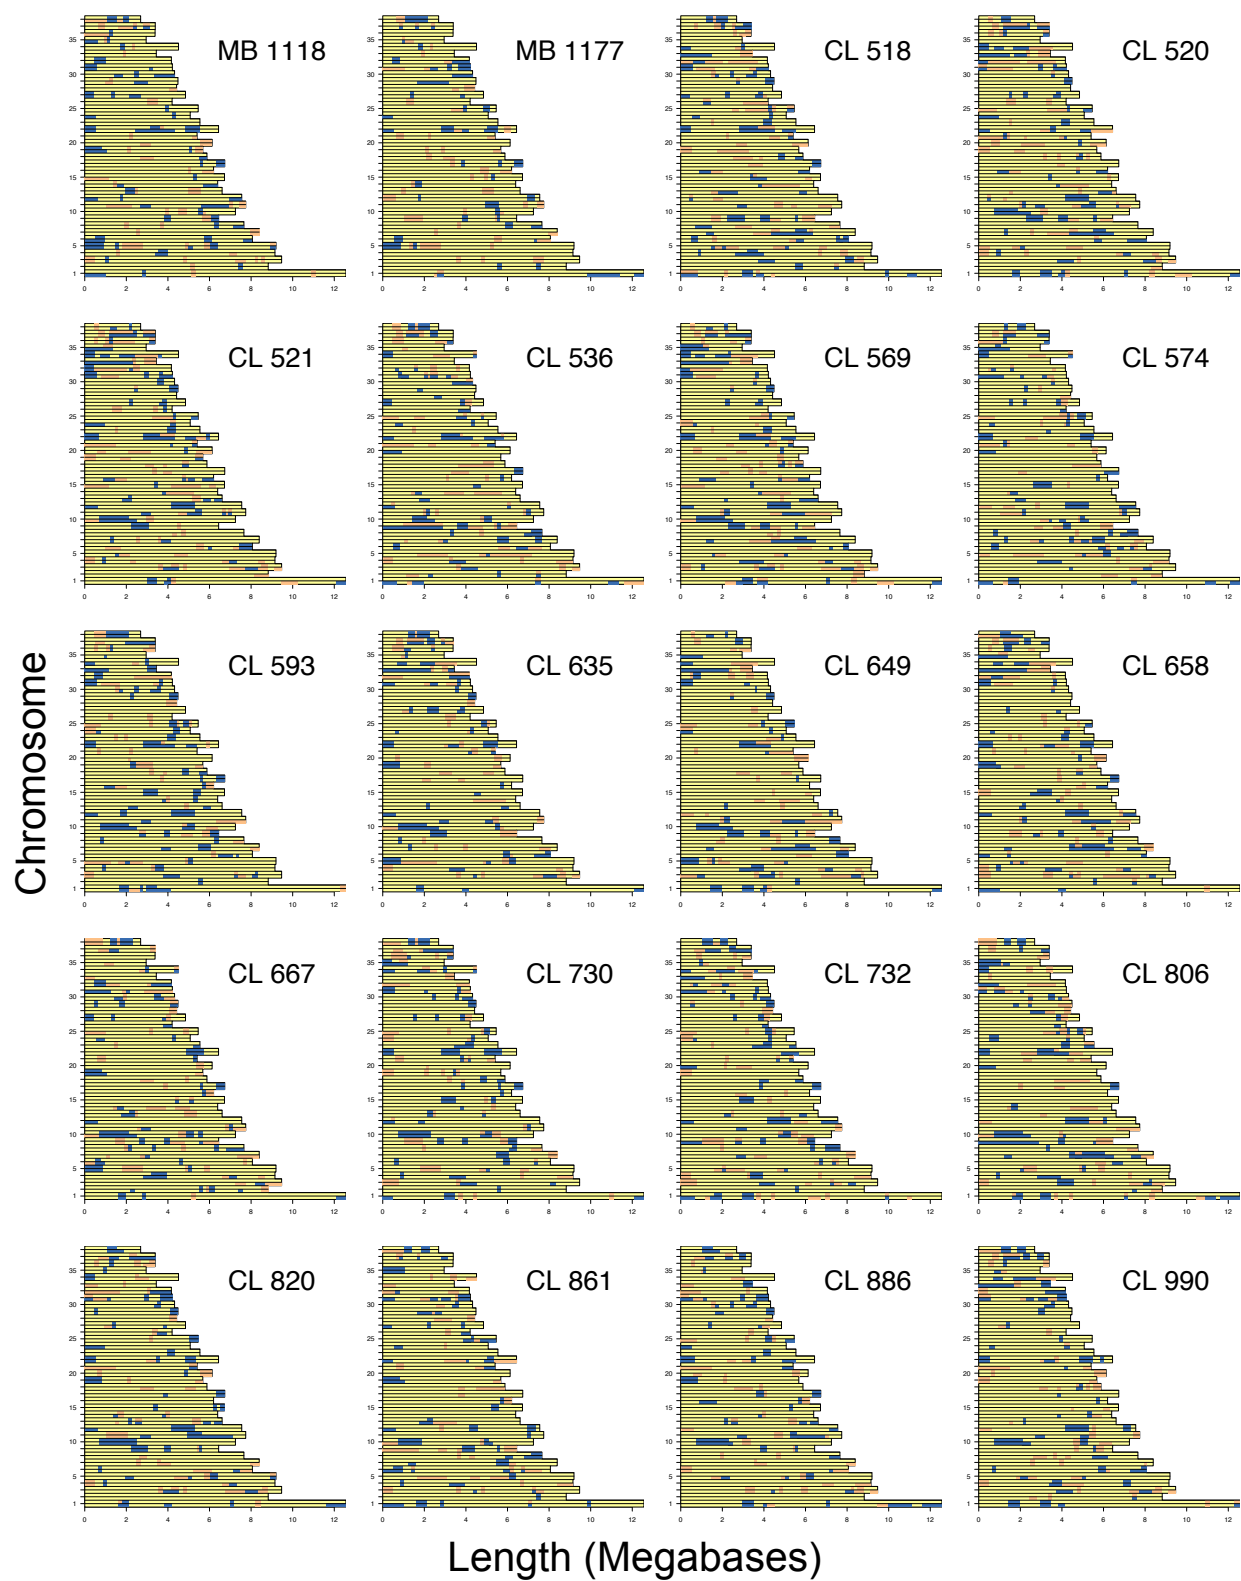



# Fitak\_SupMat\_FigS3 Genomic ancestry of Mexican wolves JHered

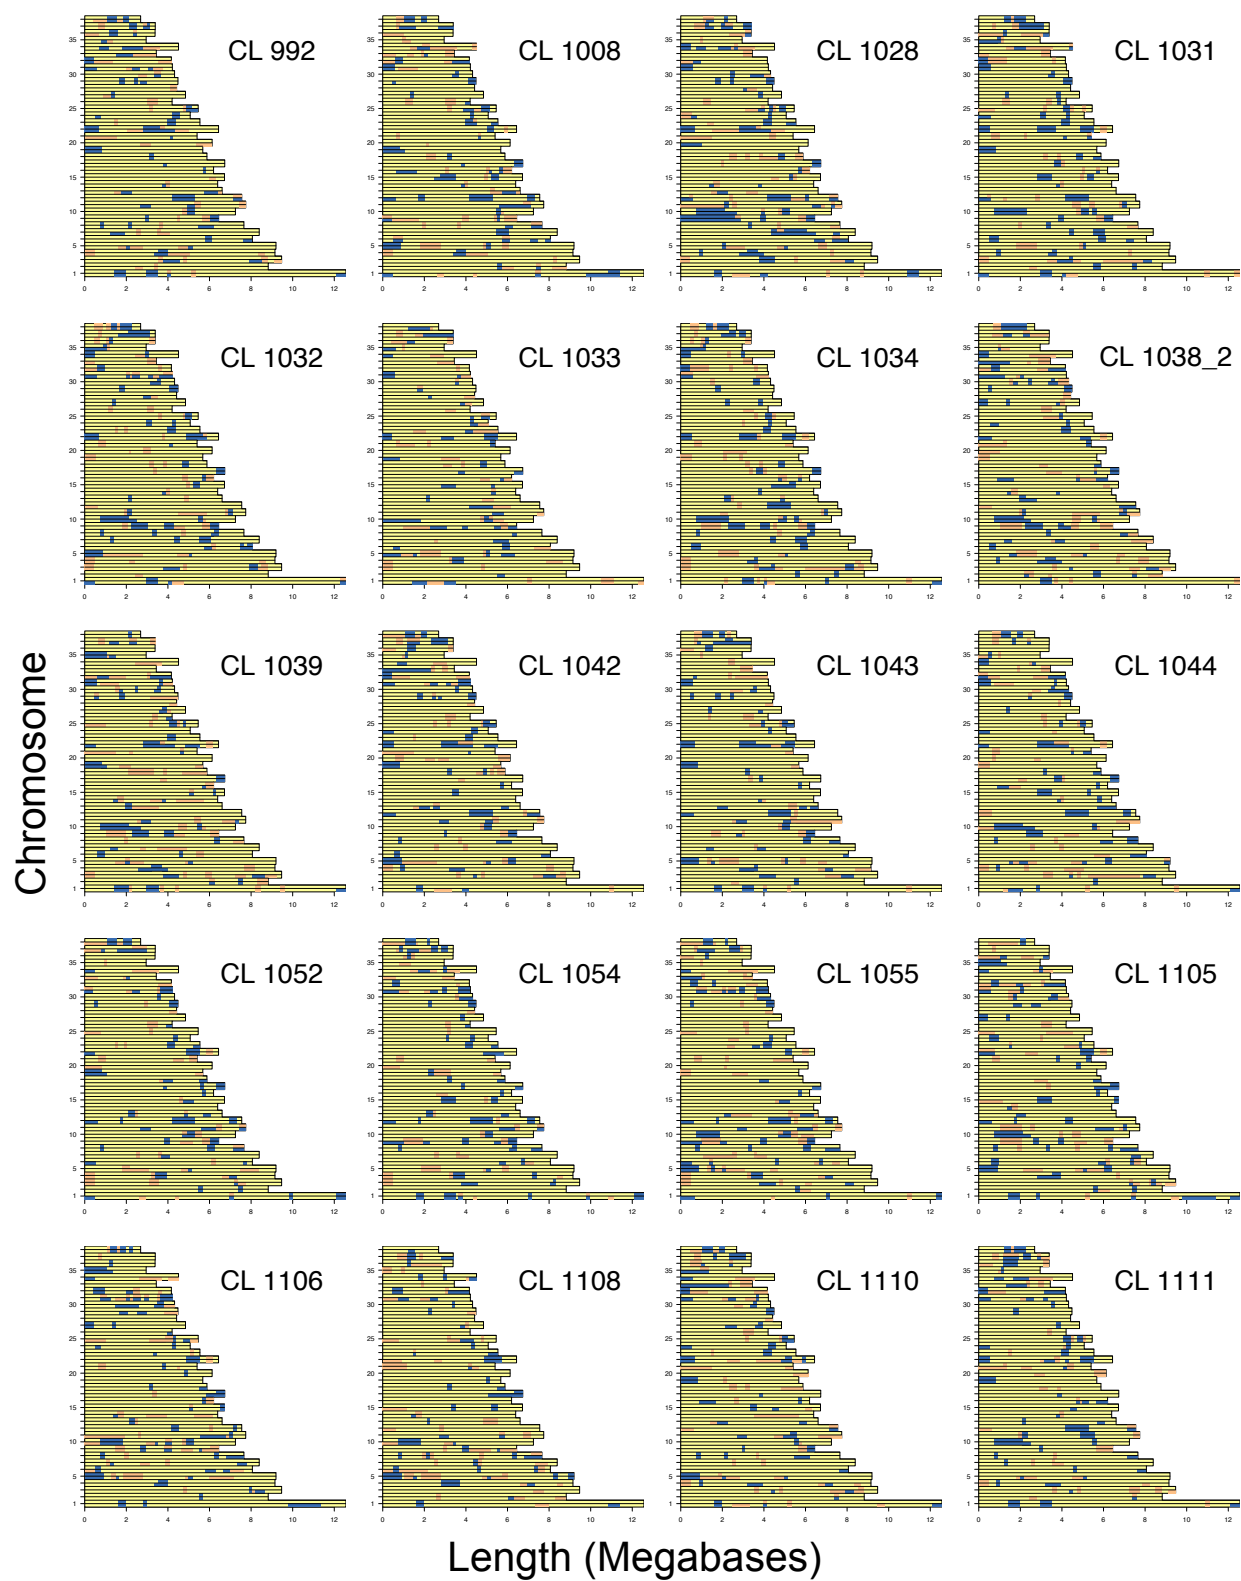

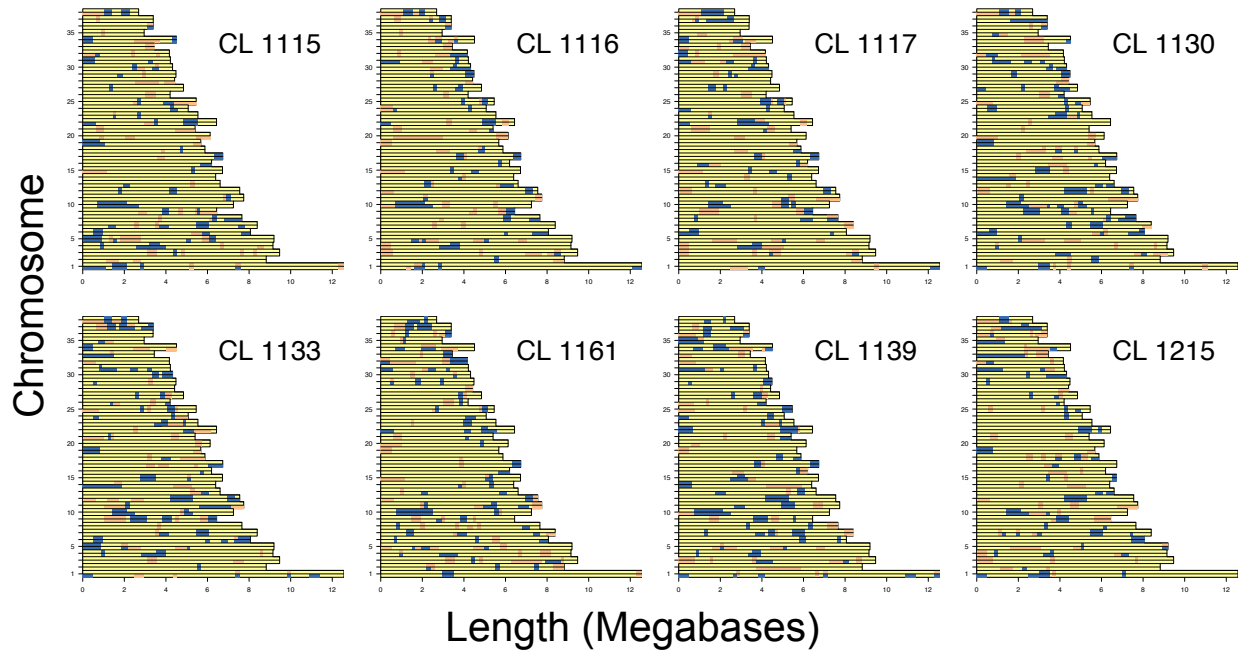

Supplement: esy009_suppl_supplementary_tables_and_figures.pdf [file esy009_suppl_supplementary_tables_and_figures.pdf]
